# Supplementary material for: The Research and Mechanism of Extracting Vitamin B6 Using Aqueous Two-Phase Systems
Source: Hindawi journal article supplement (doi:10.1155/2020/4983518), 2020-06-25
Supplement: f1 [file 4983518.f1.pdf]

## **Supplementary Material**

### **The research and mechanism of extracting vitamin B<sub>6</sub> using Aqueous Two-Phase Systems**

Changyu Lu<sup>1,2</sup>, Luning Gao<sup>1</sup>, Aibing Chen<sup>3</sup>, Duo Li<sup>1</sup>, and Yahong Zhou<sup>1</sup>

<sup>1</sup> School of Water Resources and Environment, Hebei Province Key Laboratory of Sustained Utilization and Development of Water Resources, Hebei Province Collaborative Innovation Center for Sustainable Utilization of Water Resources and Optimization of Industrial Structure, Hebei GEO University, Shijiazhuang 050031, China.

<sup>2</sup> School of Geology and Environment, Xi'an University of Science and Technology, Xi'an 710064, Shanxi, China.

<sup>3</sup> College of Chemical and Pharmaceutical Engineering, Hebei University of Science and Technology, Shijiazhuang 050018, China.

**Tbale S1: Values of parameters of Eq. (1) the mixture of polyethylene glycol/isopropyl alcohol + ethanol + salt ( $\text{Na}_2\text{CO}_3/\text{Na}_2\text{SO}_4$ ) + water ATPSs at different temperatures.**

| T/K                                                      | $n_0$  | $a_1$  | $a_2$  | 100sd <sup>a</sup> |
|----------------------------------------------------------|--------|--------|--------|--------------------|
| Polyethylene Glycol + Ethanol + $\text{Na}_2\text{SO}_4$ |        |        |        |                    |
| 308.15                                                   | 1.3313 | 0.1522 | 0.1925 | 0.016              |
| 318.15                                                   | 1.3299 | 0.1536 | 0.1858 | 0.015              |
| 328.15                                                   | 1.3282 | 0.1544 | 0.1779 | 0.025              |
| Isopropyl Alcohol + Ethanol + $\text{Na}_2\text{SO}_4$   |        |        |        |                    |
| 308.15                                                   | 1.3313 | 0.1485 | 0.1931 | 0.027              |
| Isopropyl Alcohol + Ethanol + $\text{Na}_2\text{CO}_3$   |        |        |        |                    |
| 308.15                                                   | 1.3313 | 0.1517 | 0.1655 | 0.018              |

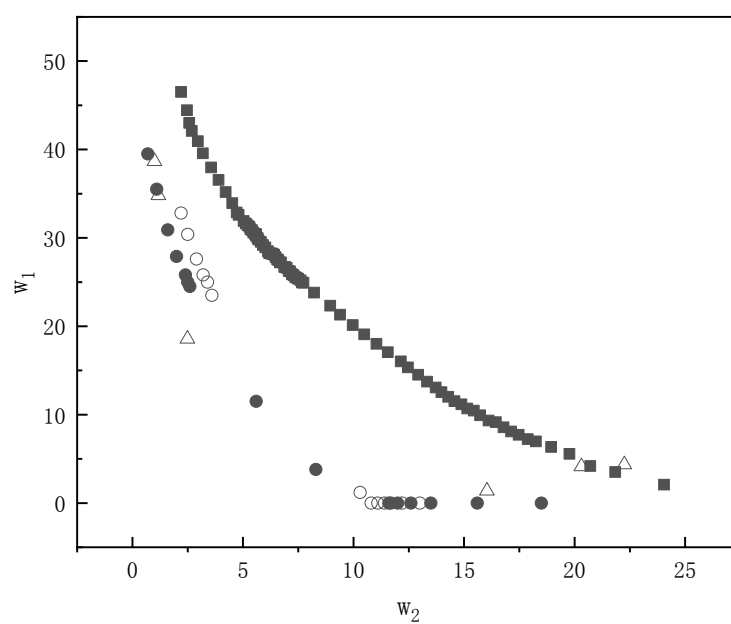

Figure S1 The binodal curves of alcohol +  $\text{Na}_2\text{SO}_4$  + water systems: ■, polyethylene glycol 1000 + ethanol +  $\text{Na}_2\text{SO}_4$  + water at T=308.15 K; △, polyethylene glycol 1500 +  $\text{Na}_2\text{SO}_4$  + water at T=313.15 K(ref. 39); ○, polyethylene glycol 4000 +  $\text{Na}_2\text{SO}_4$  + water at T=308.15 K (ref. 40) ●, polyethylene glycol 8000 +  $\text{Na}_2\text{SO}_4$  + water at T=308.15 K (ref. 40).
